# Supplementary material
Source: MDPI journal article supplement (https://www.mdpi.com/2071-1050/13/24/13778)
Supplement: s1 [file s1 › Supplementary Figures.pdf]

# Climate-change impacts on the southernmost Mediterranean arctic-alpine plant populations

Sustainability

## Supplementary Figures

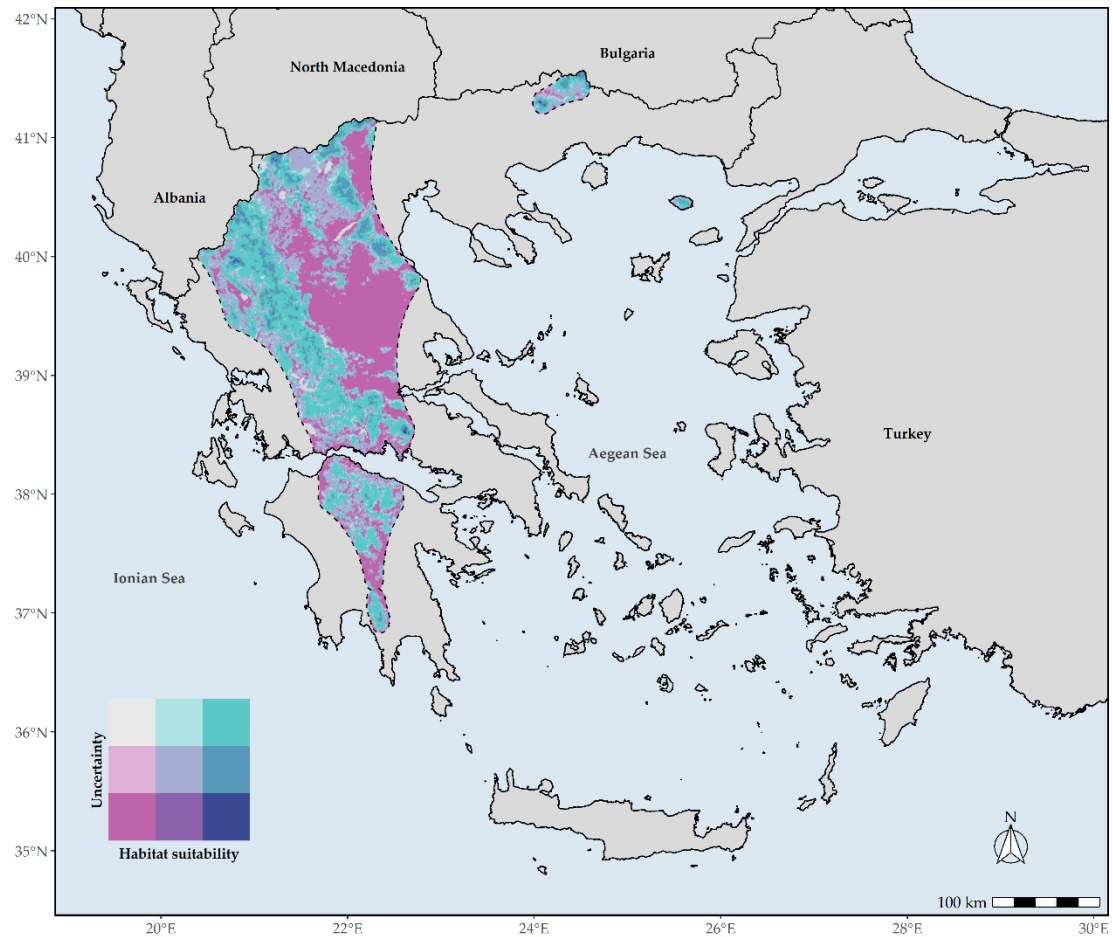

**Figure S1.** Bivariate map of the habitat suitability values and the corresponding prediction uncertainty for *Phleum alpinum* in Greece. The dashed line delineates the species' potential distributional area in Greece based on the alpha-hull method.

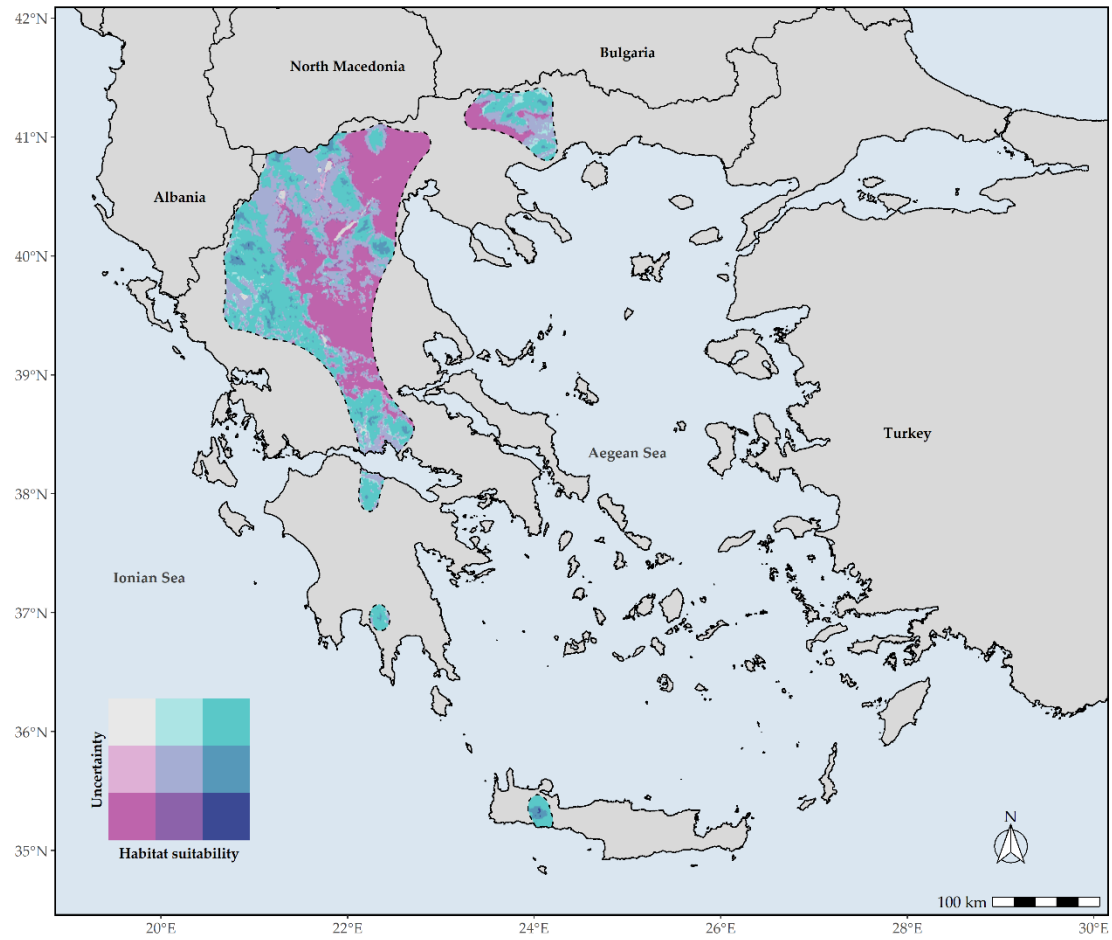

**Figure S2.** Bivariate map of the habitat suitability values and the corresponding prediction uncertainty for *Polystichum lonchitis* in Greece. The dashed line delineates the species' potential distributional area in Greece based on the alpha-hull method.

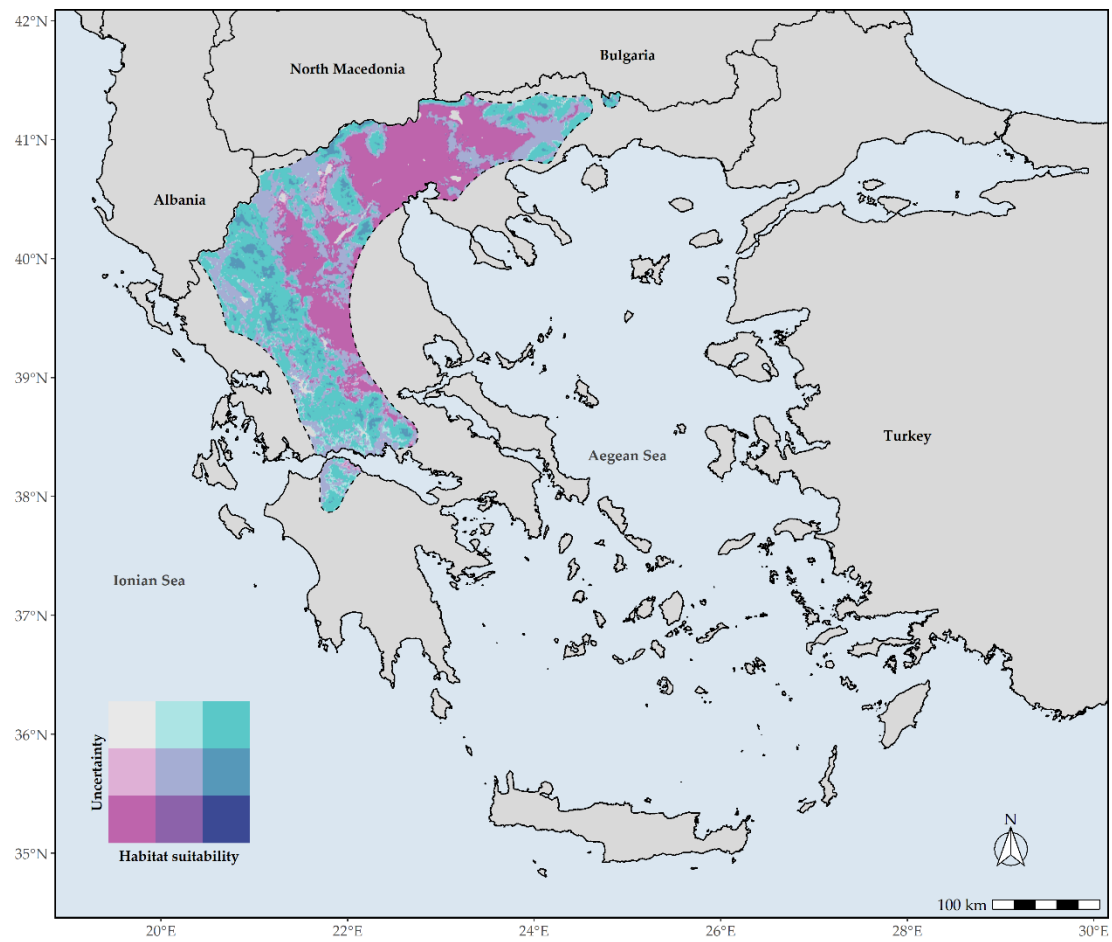

**Figure S3.** Bivariate map of the habitat suitability values and the corresponding prediction uncertainty for *Saxifraga paniculata* in Greece. The dashed line delineates the species' potential distributional area in Greece based on the alpha-hull method.

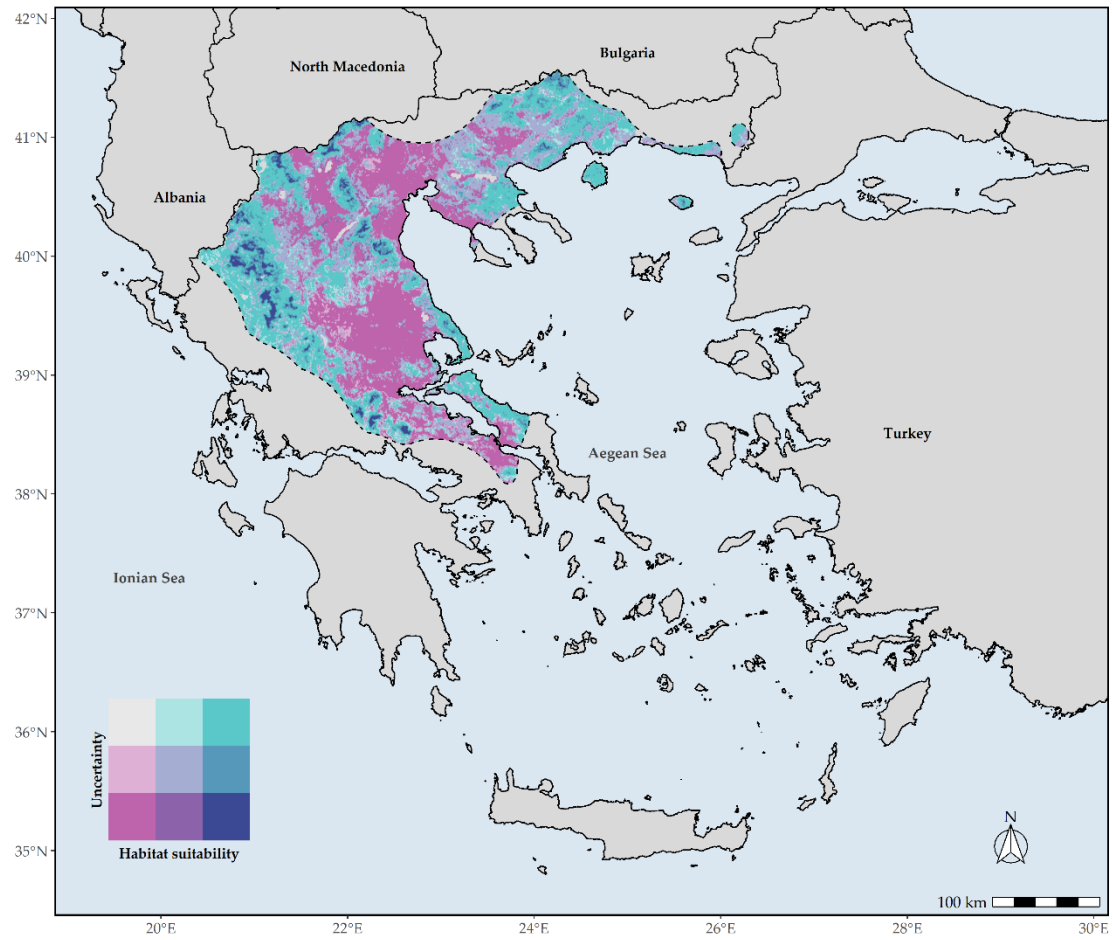

**Figure S4.** Bivariate map of the habitat suitability values and the corresponding prediction uncertainty for *Sedum annuum* in Greece. The dashed line delineates the species' potential distributional area in Greece based on the alpha-hull method.

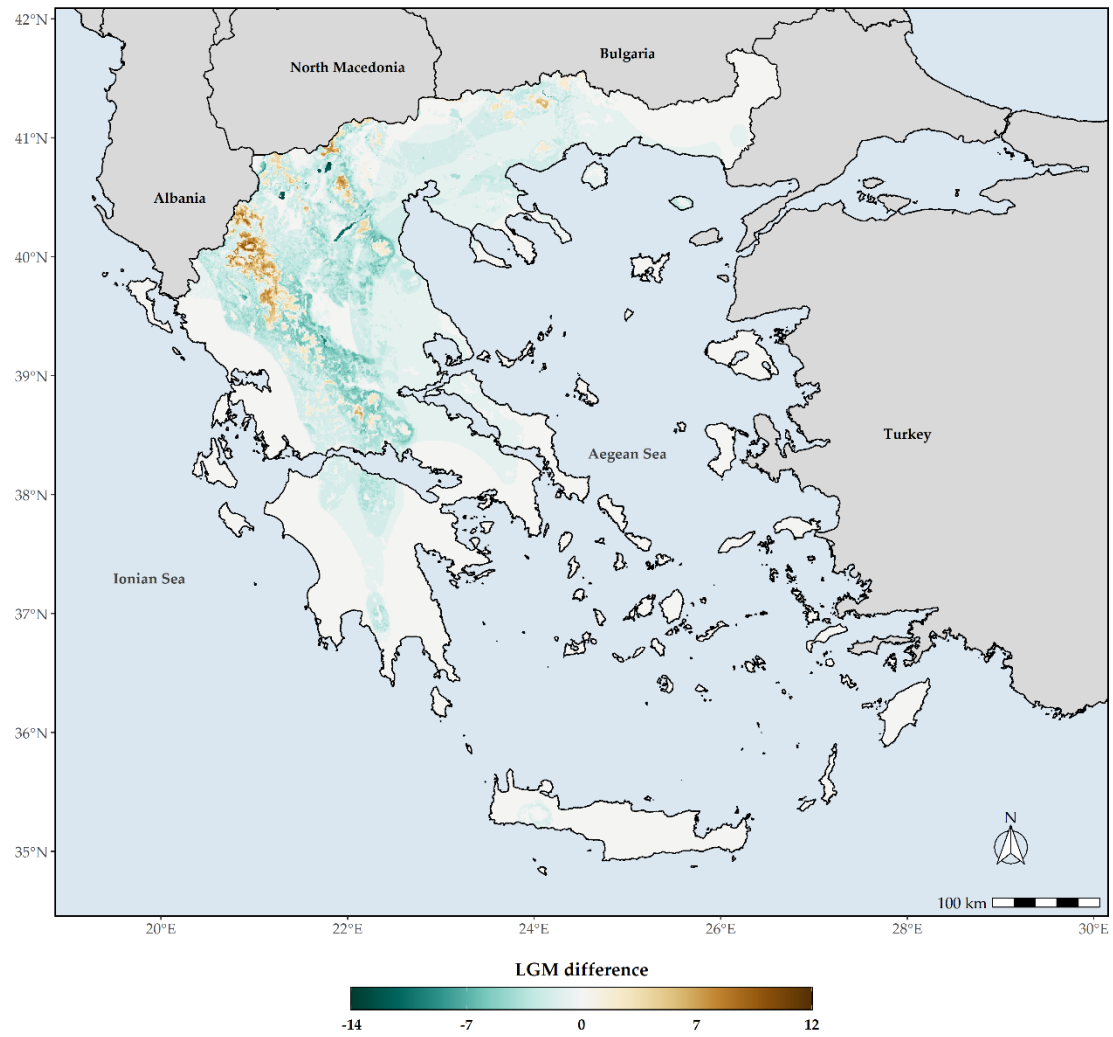

**Figure S5.** Mean difference of species richness between the present time-period and the Last Glacial Maximum (LGM; i.e., from the LGM species richness raster we subtracted the current species richness and then calculated the average of all the arctic-alpine taxa occurring in Greece and included in our analyses).

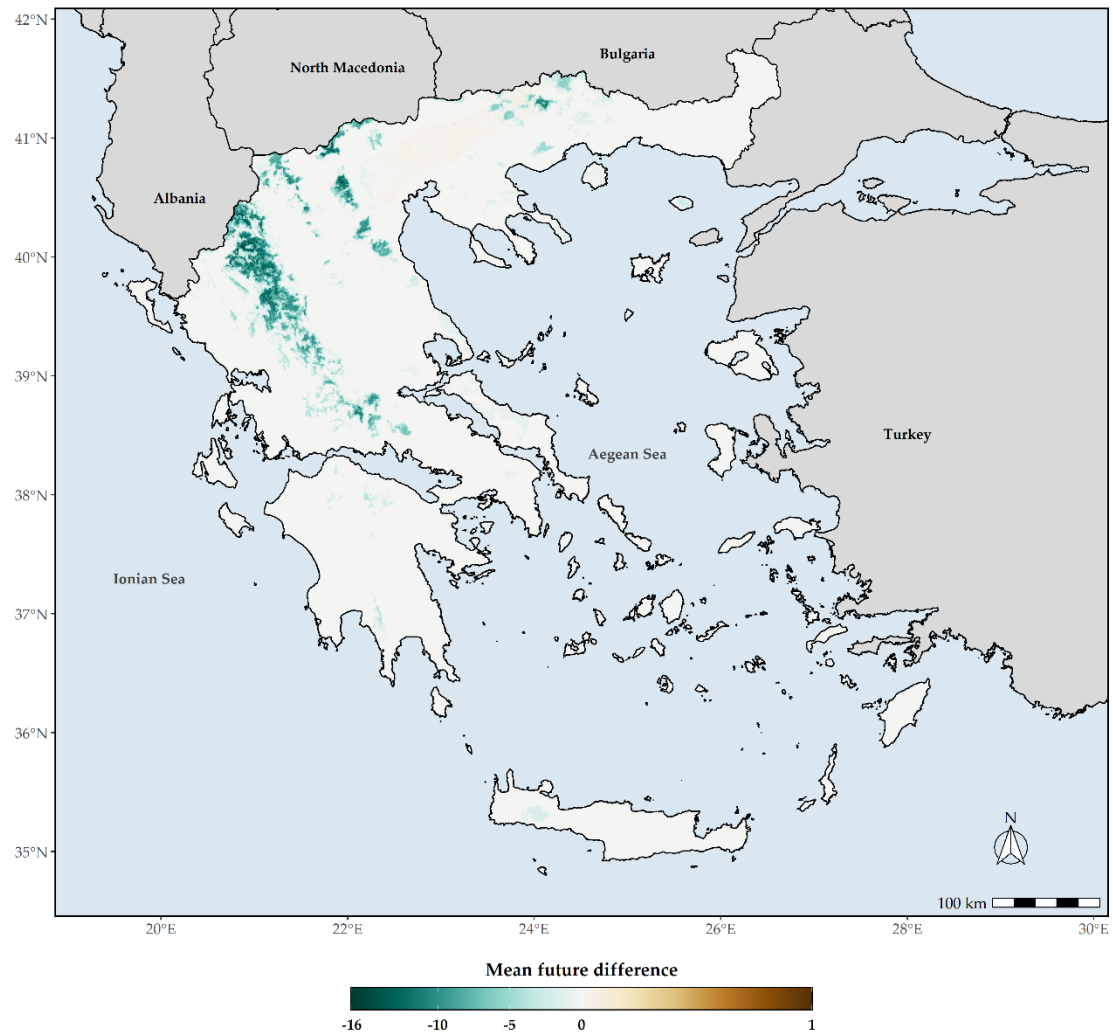

**Figure S6.** Mean difference of species richness between GCM/RCP and current status (i.e., from each GCM/RCP species richness raster we subtracted the current species richness and then calculated the average of all the arctic-alpine taxa occurring in Greece and included in our analyses).

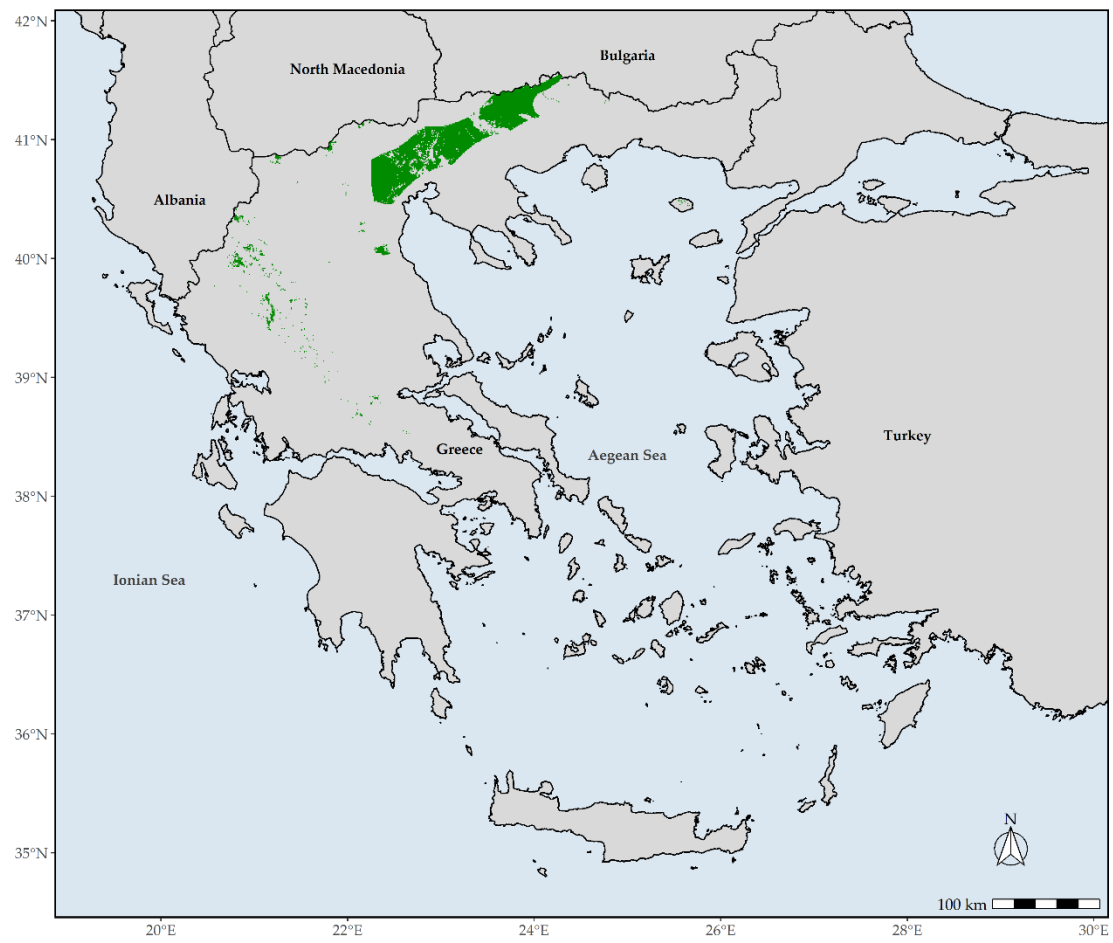

**Figure S7.** L1 (top 1%) CWE hotspots (green cells) for the BCC 2.6 RCP time-period.

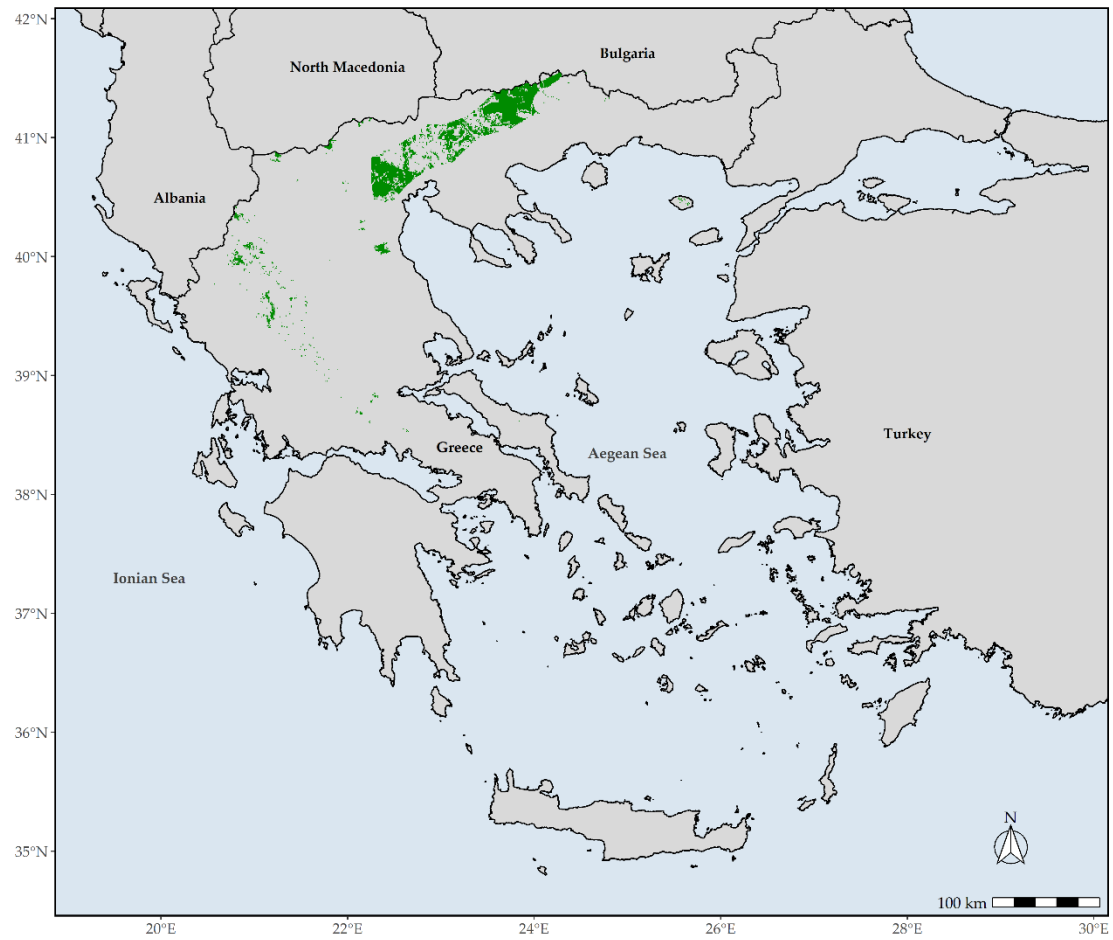

**Figure S8.** L1 (top 1%) CWE hotspots (green cells) for the CCSM4 2.6 RCP time-period.

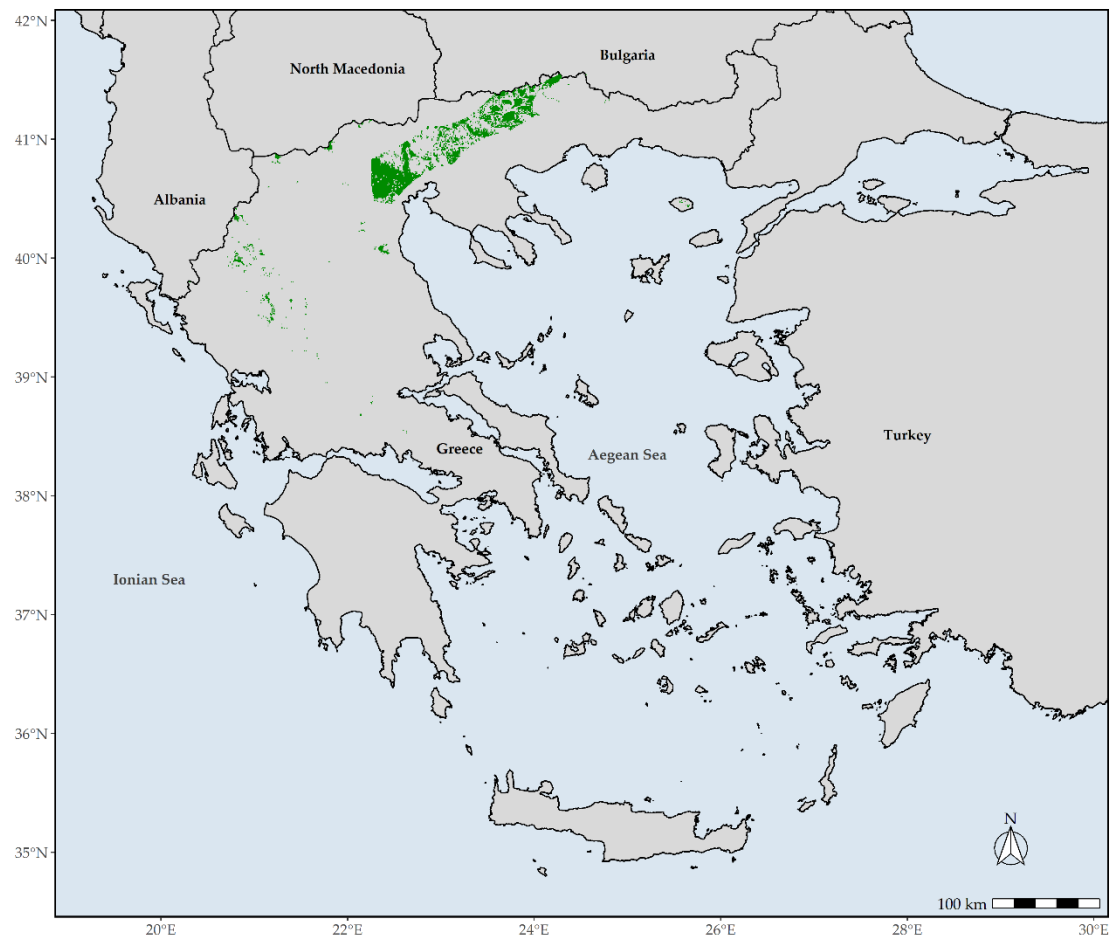

**Figure S9.** L1 (top 1%) CWE hotspots (green cells) for the CCSM4 8.5 RCP time-period.

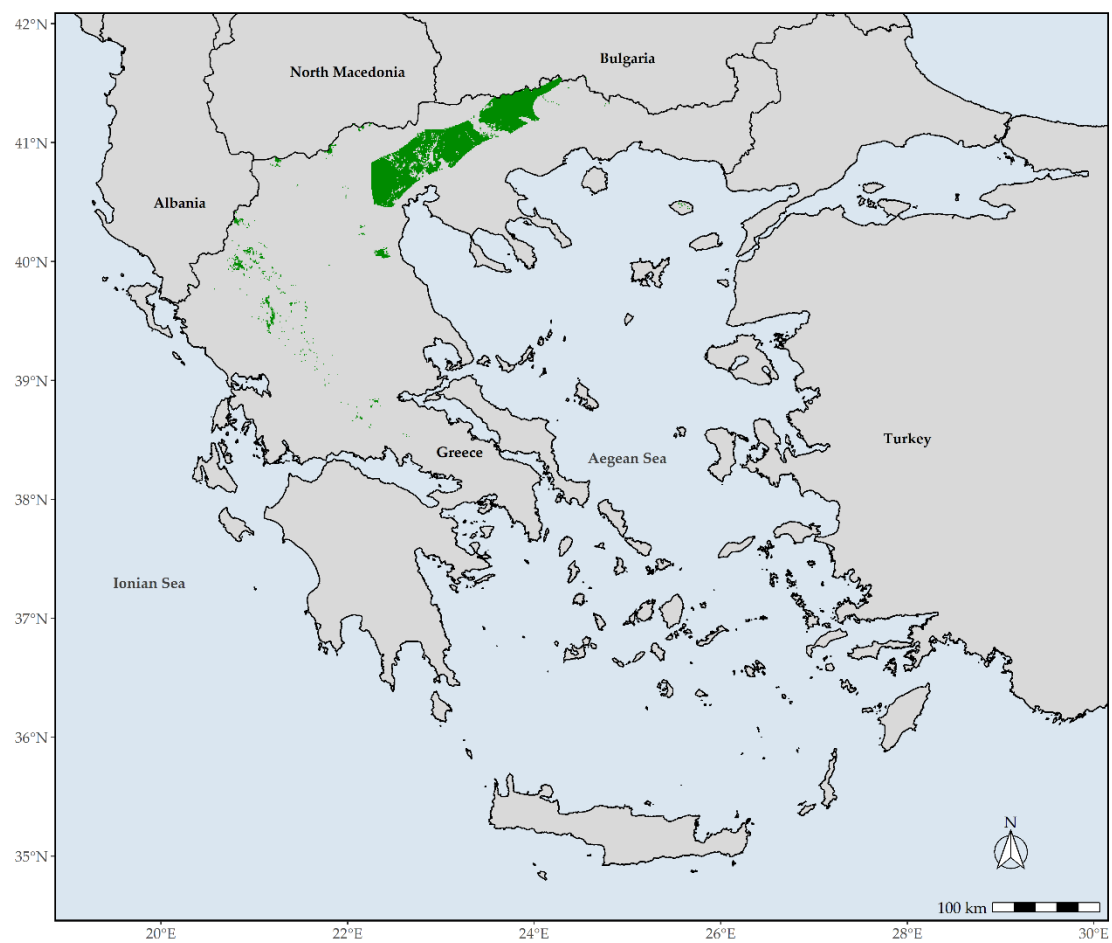

**Figure S10.** L1 (top 1%) SR hotspots (green cells) for the BCC 2.6 RCP time-period.

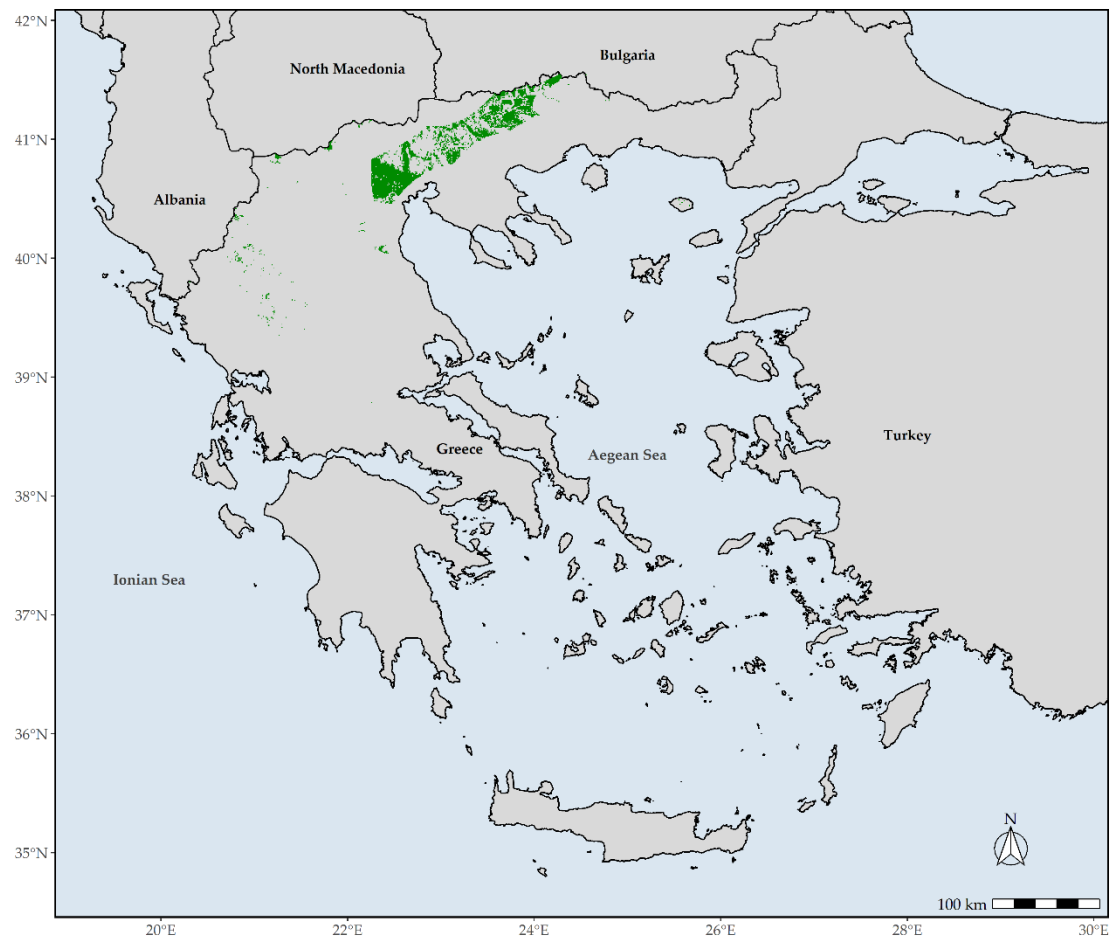

**Figure S11.** L1 (top 1%) SR hotspots (green cells) for the BCC 8.5 RCP time-period.

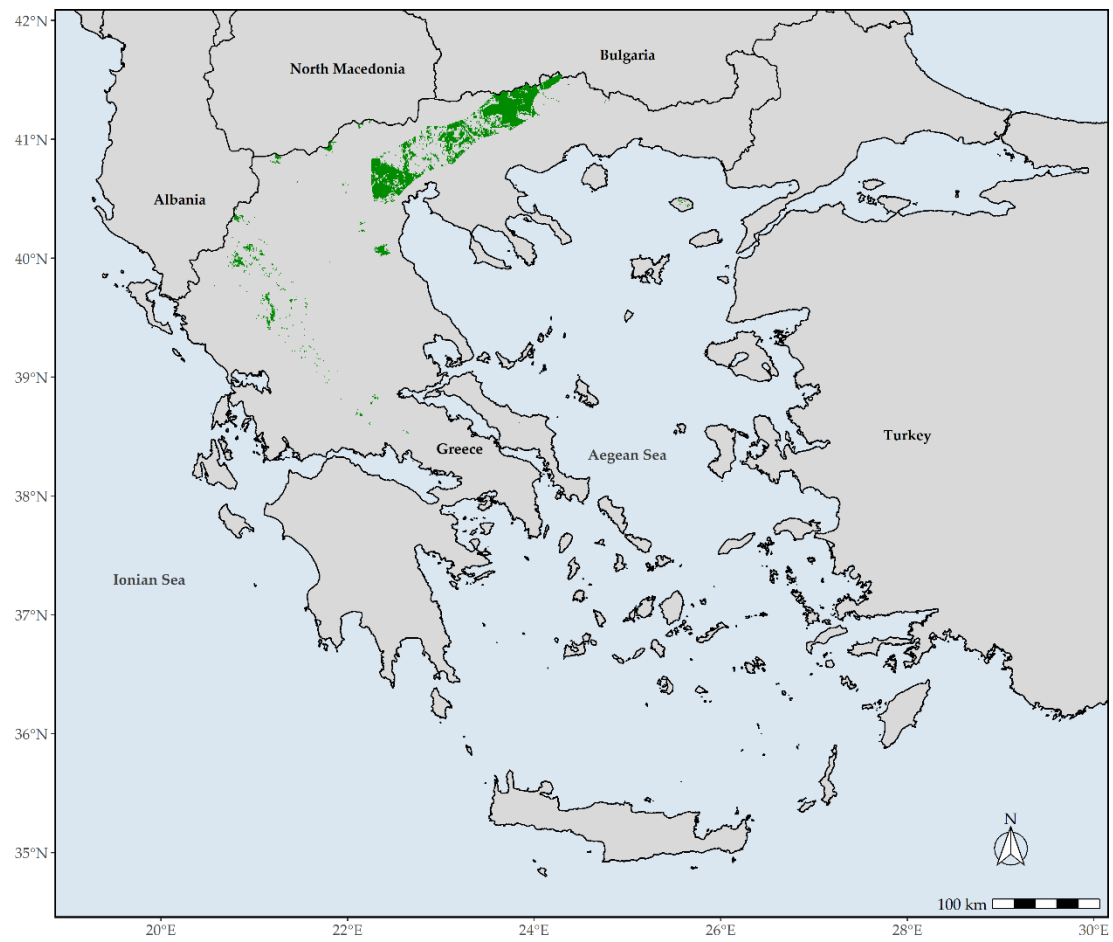

**Figure S12.** L1 (top 1%) SR hotspots (green cells) for the CCSM4 2.6 RCP time-period.

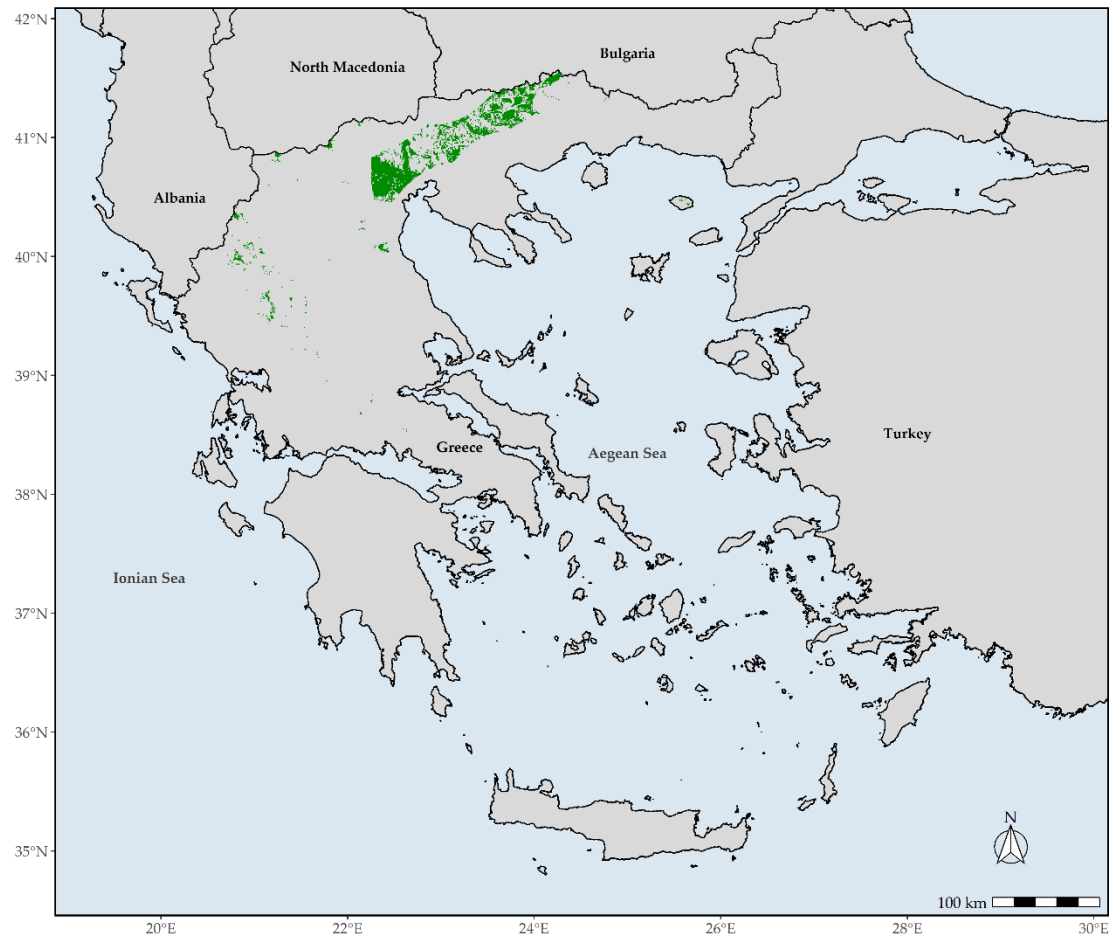

**Figure S13.** L1 (top 1%) SR hotspots (green cells) for the CCSM4 8.5 RCP time-period.

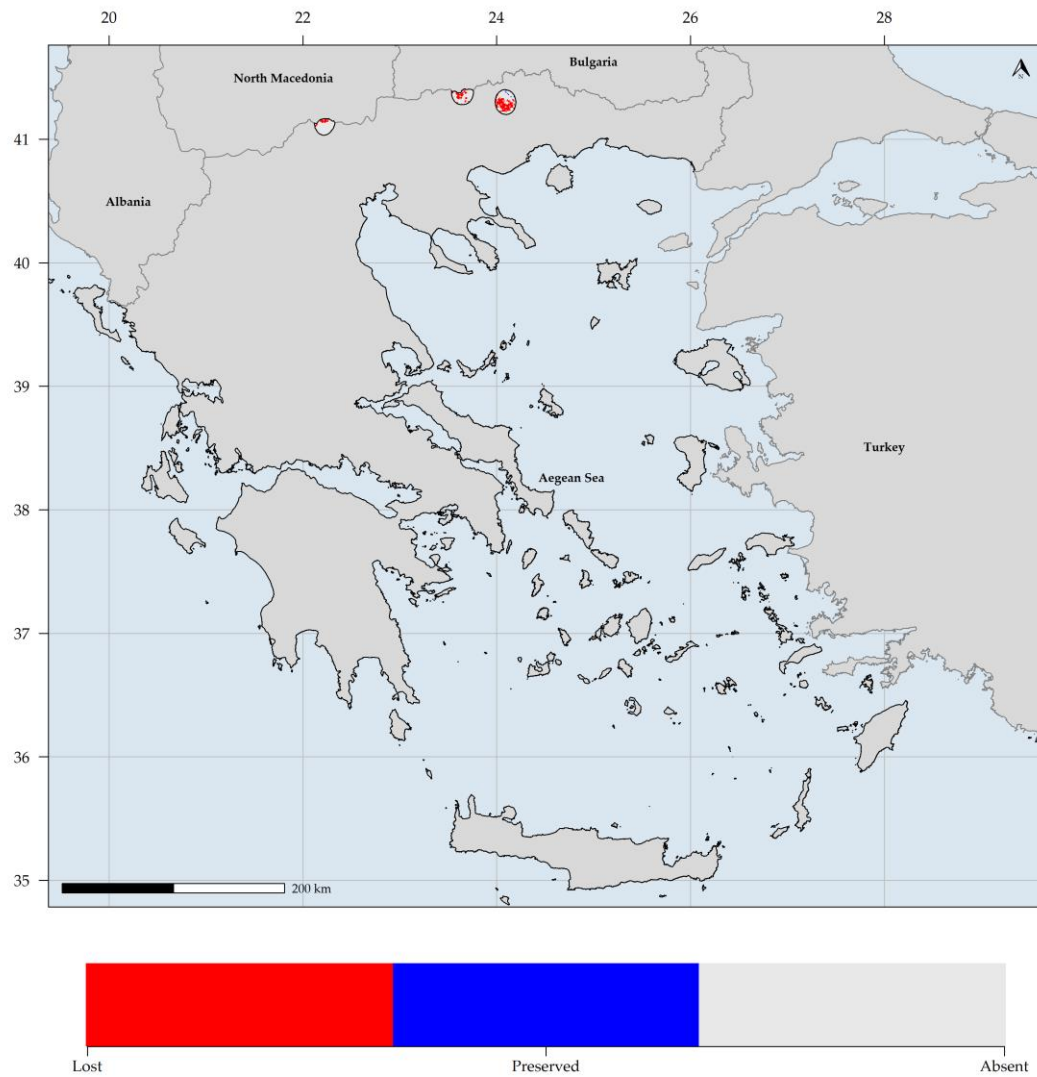

**Figure S14.** Predicted potential distribution map for 2070 and the BCC GCM and the RCP 2.6 scenario. Red grid cells: *Dryas octopetala* is currently predicted to occupy these areas but will not occupy them in the future. Blue grid cells: *Dryas octopetala* is currently predicted to occupy these areas and will continue to occupy them in the future. Light grey grid cells: *Dryas octopetala* is not currently predicted to occupy these areas and it is not predicted to occupy them in the future.



**Figure S15.** Predicted potential distribution map for 2070 and the CCSM4 GCM and the RCP 2.6 scenario. Red grid cells: *Dryas octopetala* is currently predicted to occupy these areas but will not occupy them in the future. Blue grid cells: *Dryas octopetala* is currently predicted to occupy these areas and will continue to occupy them in the future. Light grey grid cells: *Dryas octopetala* is not currently predicted to occupy these areas and it is not predicted to occupy them in the future.



**Figure S16.** Predicted potential distribution map for 2070 and the CCSM4 GCM and the RCP 8.5 scenario. Red grid cells: *Dryas octopetala* is currently predicted to occupy these areas but will not occupy them in the future. Blue grid cells: *Dryas octopetala* is currently predicted to occupy these areas and will continue to occupy them in the future. Light grey grid cells: *Dryas octopetala* is not currently predicted to occupy these areas and it is not predicted to occupy them in the future.

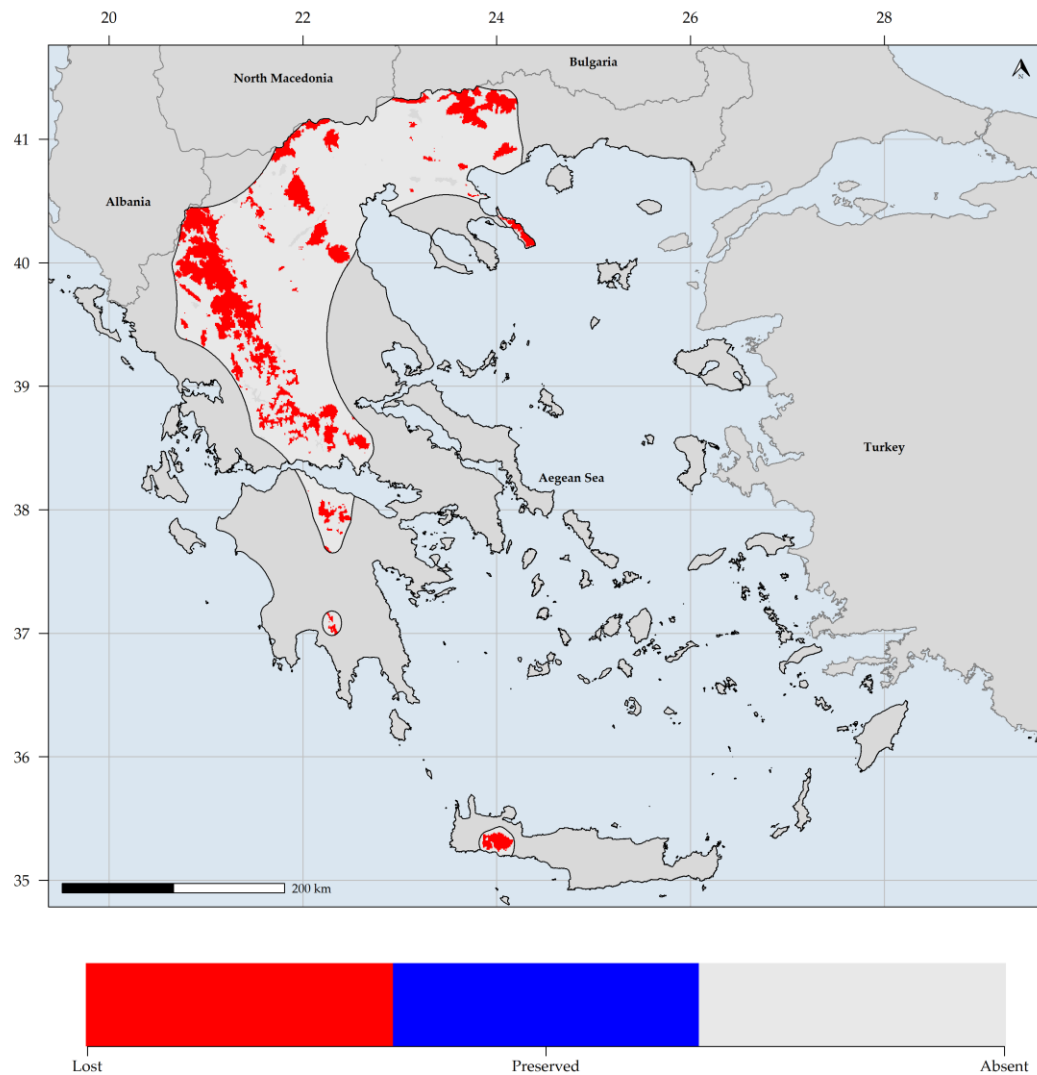

**Figure S17.** Predicted potential distribution map for 2070 and the BCC GCM and the RCP 2.6 scenario. Red grid cells: *Euphrasia salisburgensis* is currently predicted to occupy these areas but will not occupy them in the future. Blue grid cells: *Euphrasia salisburgensis* is currently predicted to occupy these areas and will continue to occupy them in the future. Light grey grid cells: *Euphrasia salisburgensis* is not currently predicted to occupy these areas and it is not predicted to occupy them in the future.

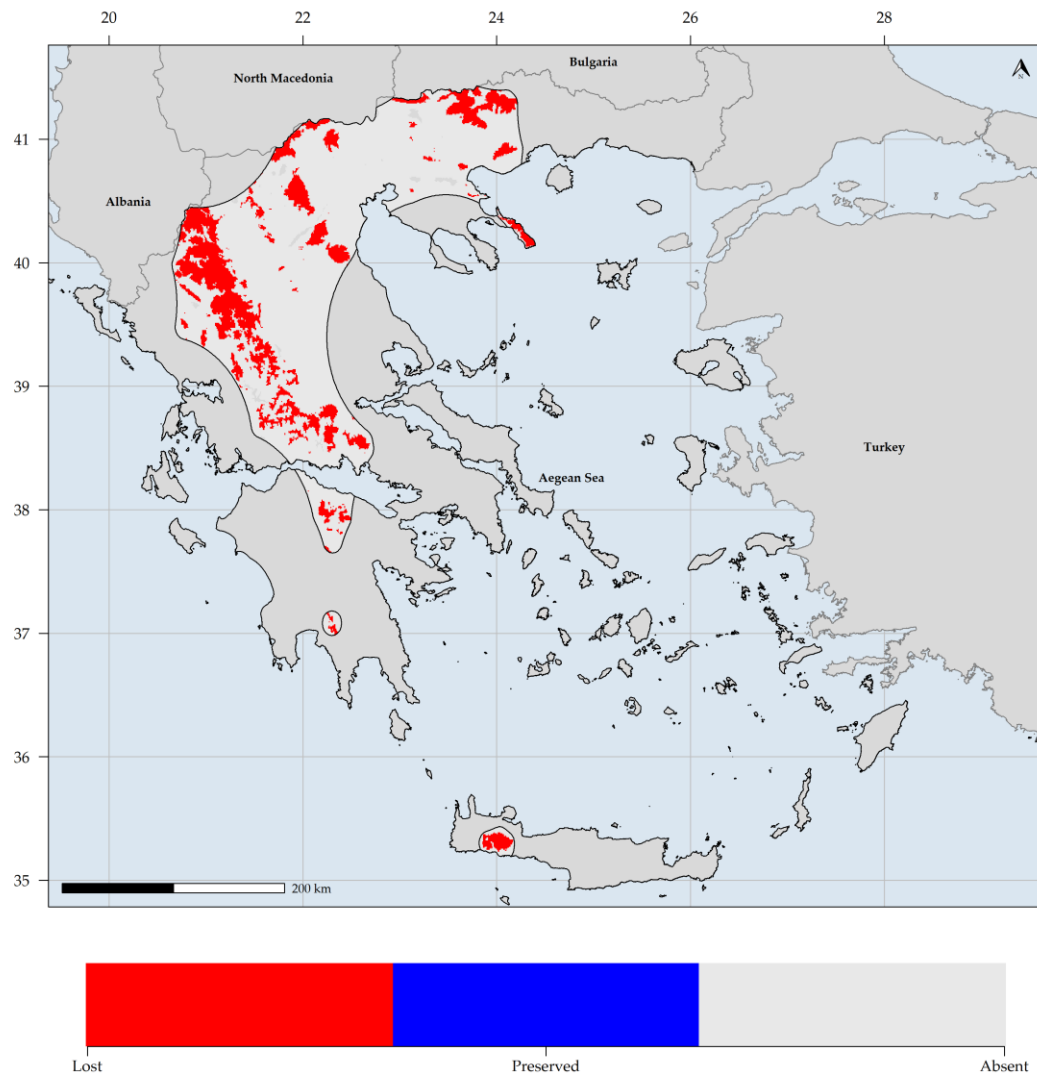

**Figure S18.** Predicted potential distribution map for 2070 and the CCSM4 GCM and the RCP 2.6 scenario. Red grid cells: *Euphrasia salisburgensis* is currently predicted to occupy these areas but will not occupy them in the future. Blue grid cells: *Euphrasia salisburgensis* is currently predicted to occupy these areas and will continue to occupy them in the future. Light grey grid cells: *Euphrasia salisburgensis* is not currently predicted to occupy these areas and it is not predicted to occupy them in the future.



**Figure S19.** Predicted potential distribution map for 2070 and the CCSM4 GCM and the RCP 8.5 scenario. Red grid cells: *Euphrasia salisburgensis* is currently predicted to occupy these areas but will not occupy them in the future. Blue grid cells: *Euphrasia salisburgensis* is currently predicted to occupy these areas and will continue to occupy them in the future. Light grey grid cells: *Euphrasia salisburgensis* is not currently predicted to occupy these areas and it is not predicted to occupy them in the future.
