# Supplementary material
Source: MDPI journal article supplement (https://www.mdpi.com/2071-1050/13/24/13778)
Supplement: s1 [file s1 › Tables v2.xlsx]

## Sheet: Table legends
Table S1. The arctic-alpine taxa occurring in Greece
Table S2. The uncorrelated predictor variables used in the main analyses, along with their abbreviations.
Table S3. Evaluation of models’ predictive performance via several discrimination (AUC, AUC-PR, TSS) and calibration [Brier score, Cohen’s kappa, Continuous Boyce Index (CBI), Somer’s D] metrics based on a repeated (10 times) split-sampling (calibration data: 80%; evaluation data: 20%) approach. The abbreviations of the predictor variables are as in Table S2. EOO: Extent of Occurrence (in sq. km)
Table S4. Variable importance for each of the arctic-alpine taxa occurring in Greece and included in our analyses. The abbreviations of the predictor variables are as in Table S2.
Table S5. Proportion of potential area loss for each of the arctic-alpine taxa occurring in Greece and included in our analyses for every time-period and climate change model/scenario. GCM: Global Circulation Model. LGM: Last Glacial Maximum. RCP: Representative Concentration Pathway.
Table S6. Median, mean, minimal and maximal altitude (in m) for species richness (SR) and the corrected weighted endemism (CWE) hotspots. L1 SR and CWE hotspots are delineated as the cells belonging to the 1% quantile for each metric for each GCM/RCP combination. GCM: Global Circulation Model. IQR: Interquartile range. LGM: Last Glacial Maximum. RCP: Representative Concentration Pathway. SD: Stan…

## Sheet: Table S1
Taxon
Artemisia umbelliformis subsp. eriantha
Carex atrata
Cerastium cerastoides
Dryas octopetala
Epilobium alsinifolium
Epilobium anagallidifolium
Euphrasia salisburgensis
Geum reptans
Gnaphalium supinum
Gymnadenia rhellicani
Juncus trifidus
Luzula spicata
Luzula sudetica
Oxyria digyna
Phleum alpinum
Poa glauca subsp. glauca
Polystichum lonchitis
Ranunculus crenatus
Rorippa islandica
Sagina saginoides
Saxifraga adscendens subsp. adscendens
Saxifraga aizoides
Saxifraga oppositifolia
Saxifraga paniculata
Saxifraga stellaris
Saxifraga stellaris subsp. engleri
Sedum annuum
Thesium alpinum
Veronica serpyllifolia subsp. humifusa

## Sheet: Table S2
Variable abbreviation	Variable name
MTWQ	Mean temperature of the wettest quarter
MAP	Annual precipitation
AIT	Thornthwaite aridity index
PETCQ	Mean monthly potential evapotranspiration of coldest quarter
PETWQ	Mean monthly potential evapotranspiration of wettest quarter
CECSOL	Cation Exchange Capacity of soil
CLYPPT	Weight percentage of the clay particles
CRFVOL	Volumetric percentage of coarse fragments
ORCDRC	Soil organic carbon content
SLTPPT	Weight percentage of the silt particles

## Sheet: Table S3
Taxon	AUC	AUC-PR	TSS	Kappa	CBI	SomersD	Brier	Variable	EOO
Artemisia umbelliformis subsp. eriantha	1	0.867633	1	1	1	1	0.104567	MTWQ	1785.5
Cerastium cerastoides	0.917	0.950509	0.833	0.833	0.389	0.833	0.0389234	MTWQ	8321
Dryas octopetala	1	0.83801	1	1	1	1	0.0696355	MTWQ	703.7
Epilobium alsinifolium	1	0.881096	1	1	1	1	0.0874451	MTWQ	8399.1
Epilobium anagallidifolium	1	0.8	1	1	1	1	7.92088e-21	PETCQ	1284.4
Euphrasia salisburgensis	0.908	0.93786	0.818	0.818	0.889697	0.816	0.080007	ORCDRC	49242.7
Gnaphalium supinum	0.9445	0.923077	0.8335	0.8335	1	0.889	1.51141e-20	MTWQ	14044.1
Gymnadenia rhellicani	1	0.852431	1	1	1	1	0.0721149	MTWQ	3838.9
Juncus trifidus	1	0.75	1	1	1	1	4.87161e-21	SLTPPT	277.4
Luzula spicata	0.9695	0.935379	0.857	0.857	0.6765	0.9385	0.0667378	MTWQ	44807.5
Luzula sudetica	0.867	0.933563	0.625	0.625	0.421	0.7345	0.0809158	MTWQ	27358.4
Oxyria digyna	1	0.820891	1	1	1	1	0.0646364	MTWQ	1976.9
Phleum alpinum	0.9135	0.954661	0.7225	0.7225	0.952638	0.827	0.0673186	PETCQ	45631.1
Poa glauca subsp. glauca	0.75	0.867677	0.5	0.5	1	0.5	0.0708105	MTWQ	8065.5
Polystichum lonchitis	0.911	0.964794	0.8	0.8	0.919776	0.8225	0.0585507	PETCQ	37128.6
Sagina saginoides	0.96	0.884796	0.8	0.8	0.75	0.92	0.0802248	MTWQ	20698.1
Saxifraga adscendens subsp. adscendens	0.9695	0.907418	0.857	0.857	0.505	0.9385	0.040936	MTWQ	28833.8
Saxifraga paniculata	0.9275	0.975615	0.7845	0.781	0.900909	0.8545	0.0460366	PETWQ	45698.2
Sedum annuum	0.887	0.941347	0.65	0.65	0.953262	0.775	0.0946465	AIT	60518.8
Thesium alpinum	0.875	0.897717	0.75	0.75	0.4205	0.75	0.0631566	MTWQ	7734.7
Veronica serpyllifolia subsp. humifusa	0.99	0.888221	0.9285	0.9285	0.737	0.9795	0.0639485	MTWQ	27076.2

## Sheet: Table S4
Taxon	Variable	Importance
Artemisia umbelliformis subsp eriantha	MTWQ	0.541
Artemisia umbelliformis subsp eriantha	AIT	0.474
Artemisia umbelliformis subsp eriantha	MAP	0.448
Artemisia umbelliformis subsp eriantha	PETWQ	0.428
Artemisia umbelliformis subsp eriantha	CECSOL	0.405
Artemisia umbelliformis subsp eriantha	PETCQ	0.393
Artemisia umbelliformis subsp eriantha	CRFVOL	0.383
Artemisia umbelliformis subsp eriantha	ORCDRC	0.381
Artemisia umbelliformis subsp eriantha	CLYPPT	0.378
Artemisia umbelliformis subsp eriantha	SLTPPT	0.352
Cerastium cerastoides	MTWQ	0.54
Cerastium cerastoides	ORCDRC	0.509
Cerastium cerastoides	MAP	0.501
Cerastium cerastoides	AIT	0.492
Cerastium cerastoides	CRFVOL	0.487
Cerastium cerastoides	CECSOL	0.482
Cerastium cerastoides	SLTPPT	0.464
Cerastium cerastoides	CLYPPT	0.445
Cerastium cerastoides	PETWQ	0.439
Cerastium cerastoides	PETCQ	0.402
Dryas octopetala	MTWQ	0.562
Dryas octopetala	PETCQ	0.514
Dryas octopetala	CECSOL	0.513
Dryas octopetala	PETWQ	0.506
Dryas octopetala	CLYPPT	0.5
Dryas octopetala	CRFVOL	0.48
Dryas octopetala	AIT	0.474
Dryas octopetala	ORCDRC	0.416
Dryas octopetala	MAP	0.409
Dryas octopetala	SLTPPT	0.388
Epilobium alsinifolium	MTWQ	0.508
Epilobium alsinifolium	ORCDRC	0.496
Epilobium alsinifolium	CRFVOL	0.458
Epilobium alsinifolium	SLTPPT	0.458
Epilobium alsinifolium	PETWQ	0.441
Epilobium alsinifolium	CECSOL	0.413
Epilobium alsinifolium	AIT	0.409
Epilobium alsinifolium	MAP	0.398
Epilobium alsinifolium	CLYPPT	0.398
Epilobium alsinifolium	PETCQ	0.387
Epilobium anagallidifolium	PETCQ	0.487
Epilobium anagallidifolium	CRFVOL	0.468
Epilobium anagallidifolium	AIT	0.465
Epilobium anagallidifolium	CLYPPT	0.462
Epilobium anagallidifolium	ORCDRC	0.443
Epilobium anagallidifolium	MAP	0.439
Epilobium anagallidifolium	PETWQ	0.418
Epilobium anagallidifolium	CECSOL	0.415
Epilobium anagallidifolium	MTWQ	0.407
Epilobium anagallidifolium	SLTPPT	0.361
Euphrasia salisburgensis	ORCDRC	0.207
Euphrasia salisburgensis	MTWQ	0.204
Euphrasia salisburgensis	PETCQ	0.199
Euphrasia salisburgensis	AIT	0.198
Euphrasia salisburgensis	CLYPPT	0.193
Gnaphalium supinum	MTWQ	0.663
Gnaphalium supinum	MAP	0.445
Gnaphalium supinum	AIT	0.434
Gnaphalium supinum	PETWQ	0.416
Gnaphalium supinum	CECSOL	0.4
Gnaphalium supinum	CLYPPT	0.398
Gnaphalium supinum	CRFVOL	0.394
Gnaphalium supinum	PETCQ	0.391
Gnaphalium supinum	SLTPPT	0.363
Gnaphalium supinum	ORCDRC	0.36
Gymnadenia rhellicani	MTWQ	0.652
Gymnadenia rhellicani	MAP	0.502
Gymnadenia rhellicani	AIT	0.442
Gymnadenia rhellicani	PETCQ	0.412
Gymnadenia rhellicani	CECSOL	0.398
Gymnadenia rhellicani	CLYPPT	0.39
Gymnadenia rhellicani	CRFVOL	0.379
Gymnadenia rhellicani	PETWQ	0.374
Gymnadenia rhellicani	ORCDRC	0.344
Gymnadenia rhellicani	SLTPPT	0.313
Juncus trifidus	SLTPPT	0.541
Juncus trifidus	CLYPPT	0.474
Juncus trifidus	ORCDRC	0.462
Juncus trifidus	CRFVOL	0.453
Juncus trifidus	AIT	0.416
Juncus trifidus	MAP	0.405
Juncus trifidus	PETWQ	0.401
Juncus trifidus	PETCQ	0.384
Juncus trifidus	CECSOL	0.383
Juncus trifidus	MTWQ	0.364
Luzula spicata	MTWQ	0.694
Luzula spicata	MAP	0.685
Luzula spicata	AIT	0.525
Luzula spicata	PETCQ	0.445
Luzula spicata	PETWQ	0.424
Luzula spicata	ORCDRC	0.396
Luzula spicata	CLYPPT	0.395
Luzula spicata	CRFVOL	0.391
Luzula spicata	CECSOL	0.368
Luzula spicata	SLTPPT	0.315
Luzula sudetica	MTWQ	0.579
Luzula sudetica	MAP	0.564
Luzula sudetica	AIT	0.549
Luzula sudetica	PETCQ	0.526
Luzula sudetica	PETWQ	0.523
Luzula sudetica	CECSOL	0.484
Luzula sudetica	CRFVOL	0.479
Luzula sudetica	CLYPPT	0.461
Luzula sudetica	ORCDRC	0.458
Luzula sudetica	SLTPPT	0.435
Oxyria digyna	MTWQ	0.642
Oxyria digyna	CLYPPT	0.483
Oxyria digyna	PETWQ	0.48
Oxyria digyna	CECSOL	0.444
Oxyria digyna	CRFVOL	0.444
Oxyria digyna	PETCQ	0.428
Oxyria digyna	ORCDRC	0.418
Oxyria digyna	MAP	0.414
Oxyria digyna	AIT	0.413
Oxyria digyna	SLTPPT	0.381
Phleum alpinum	PETCQ	0.208
Phleum alpinum	SLTPPT	0.2
Phleum alpinum	MTWQ	0.199
Phleum alpinum	ORCDRC	0.197
Phleum alpinum	CRFVOL	0.195
Poa glauca subsp glauca	MTWQ	0.545
Poa glauca subsp glauca	AIT	0.536
Poa glauca subsp glauca	MAP	0.516
Poa glauca subsp glauca	CRFVOL	0.471
Poa glauca subsp glauca	CECSOL	0.462
Poa glauca subsp glauca	SLTPPT	0.436
Poa glauca subsp glauca	ORCDRC	0.421
Poa glauca subsp glauca	CLYPPT	0.42
Poa glauca subsp glauca	PETWQ	0.417
Poa glauca subsp glauca	PETCQ	0.372
Polystichum lonchitis	PETCQ	0.256
Polystichum lonchitis	ORCDRC	0.253
Polystichum lonchitis	CRFVOL	0.246
Polystichum lonchitis	PETWQ	0.245
Sagina saginoides	MTWQ	0.595
Sagina saginoides	MAP	0.549
Sagina saginoides	AIT	0.491
Sagina saginoides	PETWQ	0.42
Sagina saginoides	PETCQ	0.406
Sagina saginoides	ORCDRC	0.374
Sagina saginoides	CRFVOL	0.362
Sagina saginoides	CECSOL	0.355
Sagina saginoides	CLYPPT	0.336
Sagina saginoides	SLTPPT	0.273
Saxifraga adscendens subsp adscendens	MTWQ	0.652
Saxifraga adscendens subsp adscendens	AIT	0.519
Saxifraga adscendens subsp adscendens	PETWQ	0.491
Saxifraga adscendens subsp adscendens	ORCDRC	0.471
Saxifraga adscendens subsp adscendens	MAP	0.463
Saxifraga adscendens subsp adscendens	CECSOL	0.446
Saxifraga adscendens subsp adscendens	CRFVOL	0.445
Saxifraga adscendens subsp adscendens	PETCQ	0.429
Saxifraga adscendens subsp adscendens	CLYPPT	0.41
Saxifraga adscendens subsp adscendens	SLTPPT	0.403
Saxifraga paniculata	PETWQ	0.257
Saxifraga paniculata	ORCDRC	0.254
Saxifraga paniculata	PETCQ	0.248
Saxifraga paniculata	CRFVOL	0.241
Sedum annuum	AIT	0.129
Sedum annuum	PETWQ	0.127
Sedum annuum	MAP	0.126
Sedum annuum	CLYPPT	0.126
Sedum annuum	MTWQ	0.124
Sedum annuum	PETCQ	0.123
Sedum annuum	ORCDRC	0.123
Sedum annuum	CRFVOL	0.122
Thesium alpinum	MTWQ	0.541
Thesium alpinum	MAP	0.485
Thesium alpinum	PETWQ	0.454
Thesium alpinum	AIT	0.447
Thesium alpinum	CECSOL	0.441
Thesium alpinum	PETCQ	0.436
Thesium alpinum	CLYPPT	0.399
Thesium alpinum	CRFVOL	0.386
Thesium alpinum	ORCDRC	0.384
Thesium alpinum	SLTPPT	0.362
Veronica serpyllifolia subsp humifusa	MTWQ	0.582
Veronica serpyllifolia subsp humifusa	CRFVOL	0.51
Veronica serpyllifolia subsp humifusa	MAP	0.493
Veronica serpyllifolia subsp humifusa	ORCDRC	0.493
Veronica serpyllifolia subsp humifusa	PETWQ	0.456
Veronica serpyllifolia subsp humifusa	AIT	0.454
Veronica serpyllifolia subsp humifusa	CECSOL	0.454
Veronica serpyllifolia subsp humifusa	CLYPPT	0.454
Veronica serpyllifolia subsp humifusa	PETCQ	0.441
Veronica serpyllifolia subsp humifusa	SLTPPT	0.441

## Sheet: Table S5
Taxon	GCM	RCP	%Area loss
Artemisia umbelliformis subsp. eriantha	BCC	2.6	-96.762
Artemisia umbelliformis subsp. eriantha	BCC	8.5	-96.762
Artemisia umbelliformis subsp. eriantha	CCSM4	2.6	-96.762
Artemisia umbelliformis subsp. eriantha	CCSM4	8.5	-96.762
Artemisia umbelliformis subsp. eriantha	LGM		0
Cerastium cerastoides	BCC	2.6	-97.563
Cerastium cerastoides	BCC	8.5	-97.563
Cerastium cerastoides	CCSM4	2.6	-97.563
Cerastium cerastoides	CCSM4	8.5	-97.563
Cerastium cerastoides	LGM		0
Dryas octopetala	BCC	2.6	-97.27
Dryas octopetala	BCC	8.5	-97.27
Dryas octopetala	CCSM4	2.6	-97.27
Dryas octopetala	CCSM4	8.5	-97.27
Dryas octopetala	LGM		0
Epilobium alsinifolium	BCC	2.6	-98.268
Epilobium alsinifolium	BCC	8.5	-98.268
Epilobium alsinifolium	CCSM4	2.6	-98.268
Epilobium alsinifolium	CCSM4	8.5	-98.268
Epilobium alsinifolium	LGM		0
Epilobium anagallidifolium	BCC	2.6	-99.429
Epilobium anagallidifolium	BCC	8.5	-99.429
Epilobium anagallidifolium	CCSM4	2.6	-99.429
Epilobium anagallidifolium	CCSM4	8.5	-99.429
Epilobium anagallidifolium	LGM		0
Euphrasia salisburgensis	BCC	2.6	-100
Euphrasia salisburgensis	BCC	8.5	-100
Euphrasia salisburgensis	CCSM4	2.6	-100
Euphrasia salisburgensis	CCSM4	8.5	-100
Euphrasia salisburgensis	LGM		-80.832
Gnaphalium supinum	BCC	2.6	-97.582
Gnaphalium supinum	BCC	8.5	-97.582
Gnaphalium supinum	CCSM4	2.6	-97.582
Gnaphalium supinum	CCSM4	8.5	-97.582
Gnaphalium supinum	LGM		-0.267
Gymnadenia rhellicani	BCC	2.6	-97.738
Gymnadenia rhellicani	BCC	8.5	-97.738
Gymnadenia rhellicani	CCSM4	2.6	-97.738
Gymnadenia rhellicani	CCSM4	8.5	-97.738
Gymnadenia rhellicani	LGM		0
Juncus trifidus	BCC	2.6	-98.864
Juncus trifidus	BCC	8.5	-98.864
Juncus trifidus	CCSM4	2.6	-98.864
Juncus trifidus	CCSM4	8.5	-98.864
Juncus trifidus	LGM		0
Luzula spicata	BCC	2.6	-98.252
Luzula spicata	BCC	8.5	-98.252
Luzula spicata	CCSM4	2.6	-98.252
Luzula spicata	CCSM4	8.5	-98.252
Luzula spicata	LGM		-0.639
Luzula sudetica	BCC	2.6	-98.502
Luzula sudetica	BCC	8.5	-98.502
Luzula sudetica	CCSM4	2.6	-98.502
Luzula sudetica	CCSM4	8.5	-98.502
Luzula sudetica	LGM		0
Oxyria digyna	BCC	2.6	-100
Oxyria digyna	BCC	8.5	-100
Oxyria digyna	CCSM4	2.6	-100
Oxyria digyna	CCSM4	8.5	-100
Oxyria digyna	LGM		0
Phleum alpinum	BCC	2.6	-100
Phleum alpinum	BCC	8.5	-100
Phleum alpinum	CCSM4	2.6	-100
Phleum alpinum	CCSM4	8.5	-100
Phleum alpinum	LGM		-79.808
Poa glauca subsp. glauca	BCC	2.6	-98.207
Poa glauca subsp. glauca	BCC	8.5	-98.207
Poa glauca subsp. glauca	CCSM4	2.6	-98.207
Poa glauca subsp. glauca	CCSM4	8.5	-98.207
Poa glauca subsp. glauca	LGM		-0.84
Polystichum lonchitis	BCC	2.6	-99.391
Polystichum lonchitis	BCC	8.5	-99.984
Polystichum lonchitis	CCSM4	2.6	-99.309
Polystichum lonchitis	CCSM4	8.5	-99.868
Polystichum lonchitis	LGM		-86.576
Sagina saginoides	BCC	2.6	-98.533
Sagina saginoides	BCC	8.5	-98.533
Sagina saginoides	CCSM4	2.6	-98.533
Sagina saginoides	CCSM4	8.5	-98.533
Sagina saginoides	LGM		0
Saxifraga adscendens subsp. adscendens	BCC	2.6	-98.69
Saxifraga adscendens subsp. adscendens	BCC	8.5	-98.69
Saxifraga adscendens subsp. adscendens	CCSM4	2.6	-98.69
Saxifraga adscendens subsp. adscendens	CCSM4	8.5	-98.69
Saxifraga adscendens subsp. adscendens	LGM		-0.405
Saxifraga paniculata	BCC	2.6	-99.982
Saxifraga paniculata	BCC	8.5	-100
Saxifraga paniculata	CCSM4	2.6	-99.945
Saxifraga paniculata	CCSM4	8.5	-100
Saxifraga paniculata	LGM		-83.498
Sedum annuum	BCC	2.6	-99.969
Sedum annuum	BCC	8.5	-99.796
Sedum annuum	CCSM4	2.6	-99.957
Sedum annuum	CCSM4	8.5	-99.938
Sedum annuum	LGM		-70.217
Thesium alpinum	BCC	2.6	-99.67
Thesium alpinum	BCC	8.5	-99.67
Thesium alpinum	CCSM4	2.6	-99.67
Thesium alpinum	CCSM4	8.5	-99.67
Thesium alpinum	LGM		0
Veronica serpyllifolia subsp. humifusa	BCC	2.6	-99.292
Veronica serpyllifolia subsp. humifusa	BCC	8.5	-99.958
Veronica serpyllifolia subsp. humifusa	CCSM4	2.6	-99.752
Veronica serpyllifolia subsp. humifusa	CCSM4	8.5	-99.958
Veronica serpyllifolia subsp. humifusa	LGM		-94.964

## Sheet: Table S6
Metric	GCM	RCP	Median	Mean	Min	Max	SD	IQR
SR	CCSM4	2.6	564.925	671.537	0	2710.12	666.829	1053.55
	CCSM4	8.5	294.305	545.812	0	2710.12	651.289	928.498
	BCC	2.6	331.695	526.06	0	2710.12	584.525	751.316
	BCC	8.5	244.666	486.388	0	2710.12	593.517	809.734
	LGM	-	1	1	1	1	0	0
	Present	-	1634.04	1634.96	905.044	2336.15	246.99	332.051
CWE	CCSM4	2.6	564.925	671.537	0	2710.12	666.829	1053.55
	CCSM4	8.5	294.305	545.812	0	2710.12	651.289	928.498
	BCC	2.6	331.695	526.06	0	2710.12	584.525	751.316
	BCC	8.5	244.666	486.388	0	2710.12	593.517	809.734
	LGM	-	1189.94	1155.7	141	2336.88	521.34	774.942
	Present	-	1738.88	1715.91	731.976	2691.14	311.875	404.626
